# Supplementary material for: Discovery of carboxyl-containing heteroaryldihydropyrimidine derivatives as novel HBV capsid assembly modulators with significantly improved metabolic stability
Source: Royal Society of Chemistry journal article supplement (doi:10.1039/d3md00461a), 2023-01-01

## Supporting information

### **Discovery of carboxyl-containing heteroaryldihydropyrimidine derivatives as novel HBV capsid assembly modulators with significantly improved metabolic stability**

Shujie Zhao<sup>a</sup>, Ya Wang<sup>b</sup>, Xujie Zhang<sup>a</sup>, Lijun Qiao<sup>b</sup>, Shuo Wang<sup>a</sup>, Yu Jin<sup>a</sup>, Shuo Wu<sup>b,\*</sup>, Yuhuan Li<sup>b,\*</sup>, Peng Zhan<sup>a,\*</sup>, Xinyong Liu<sup>a,\*</sup>

*<sup>a</sup>Department of Medicinal Chemistry, Key Laboratory of Chemical Biology, Ministry of Education, School of Pharmaceutical Sciences, Shandong University, 44 West Culture Road, 250012 Jinan, Shandong, PR China.*

*<sup>b</sup>CAMS Key Laboratory of Antiviral Drug Research, Beijing Key Laboratory of Antimicrobial Agents, NHC Key Laboratory of Biotechnology of Antibiotics, Institute of Medicinal Biotechnology, Chinese Academy of Medical Sciences and Peking Union Medical College, 100050 Beijing, PR China.*

\*Corresponding authors.

E-mail: wushuoimb@126.com (Wu S.); yuhuanlibj@126.com (Li Y.H.); zhanpeng1982@sdu.edu.cn (Zhan P.); xinyongl@sdu.edu.cn (Liu X.Y.)

# ESI-MS, <sup>1</sup>H NMR, and <sup>13</sup>C NMR spectra of representative target compounds

## ESI-MS, <sup>1</sup>H NMR and <sup>13</sup>C NMR spectra of compound 6a-3

BOR-45\_211006144528 #29 RT: 0.09 AV: 1 NL: 2.44E4  
T: ITMS + c ESI Full ms [150.00-1200.00]

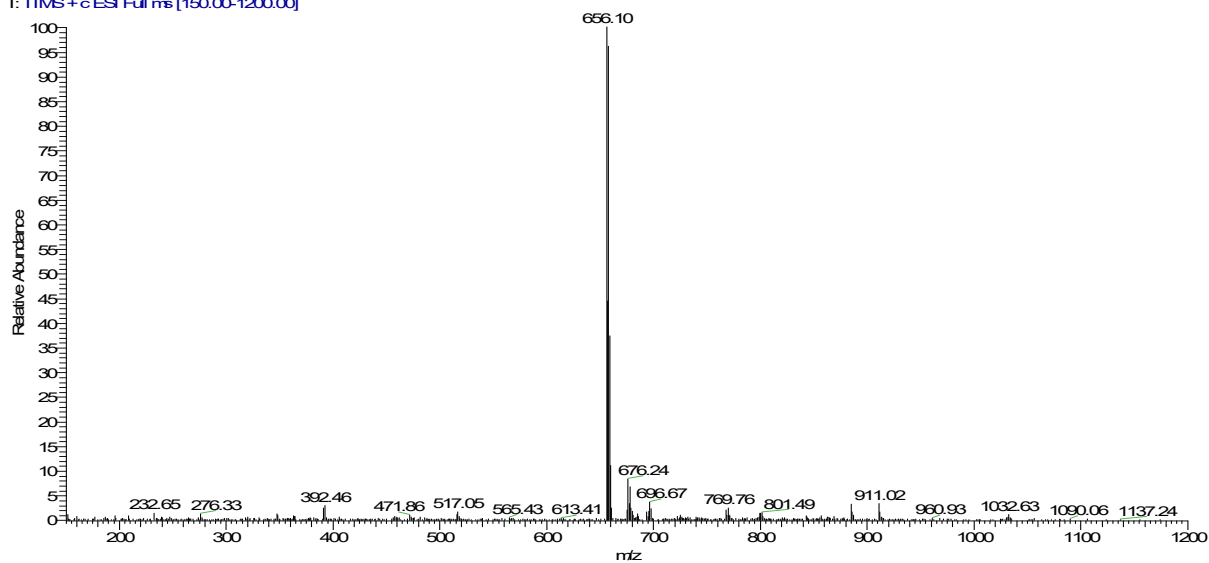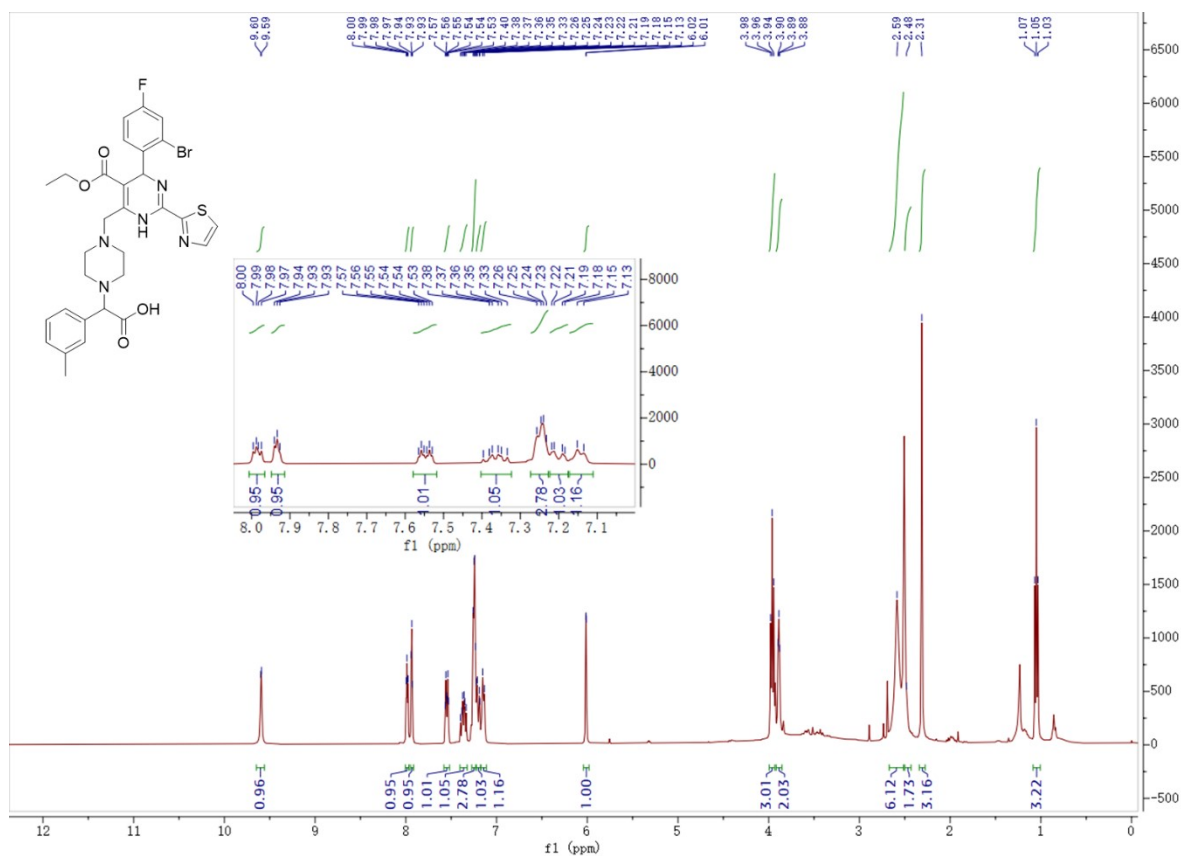

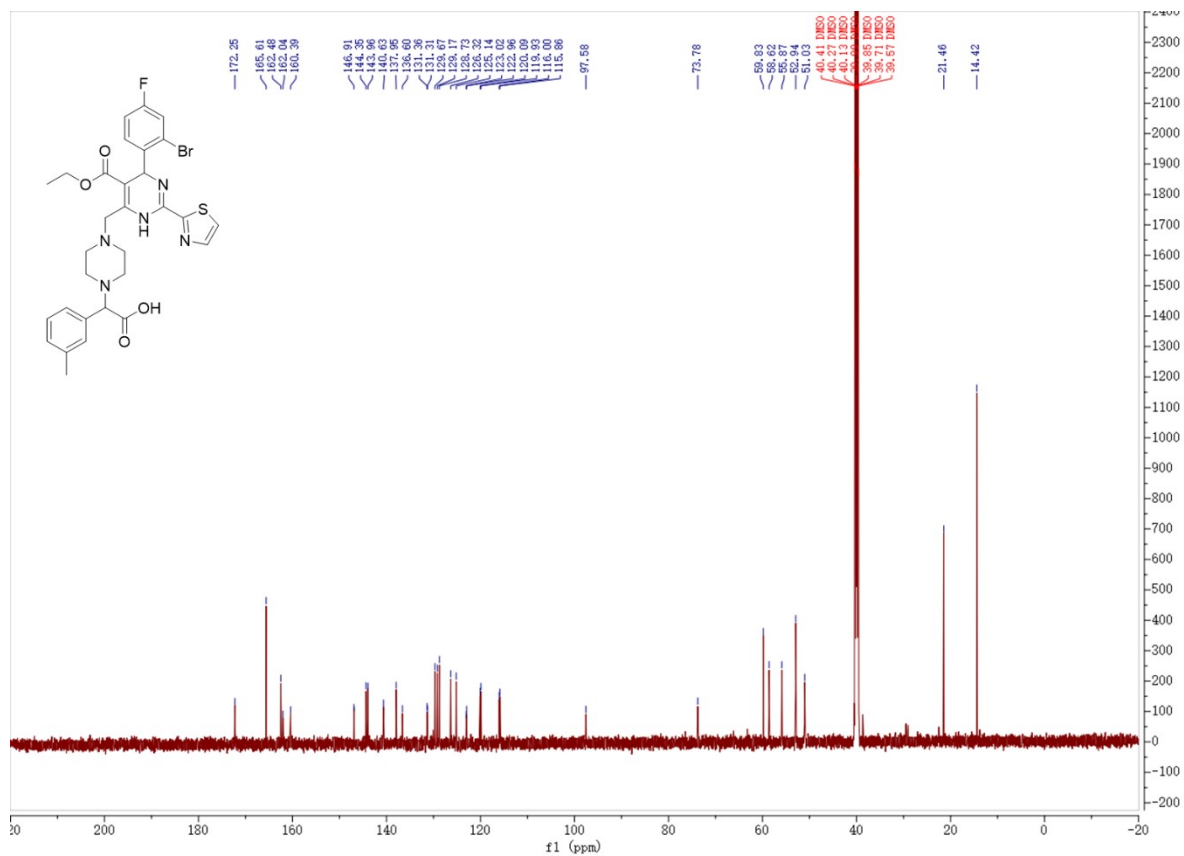

### ESI-MS, <sup>1</sup>H NMR and <sup>13</sup>C NMR spectra of compound 6a-25

CAP14\_20221217 #282-343 RT: 0.86-1.04 AV: 62 NL: 5.74E5  
 T: ITMS + c ESI Full ms [150.00-1200.00]

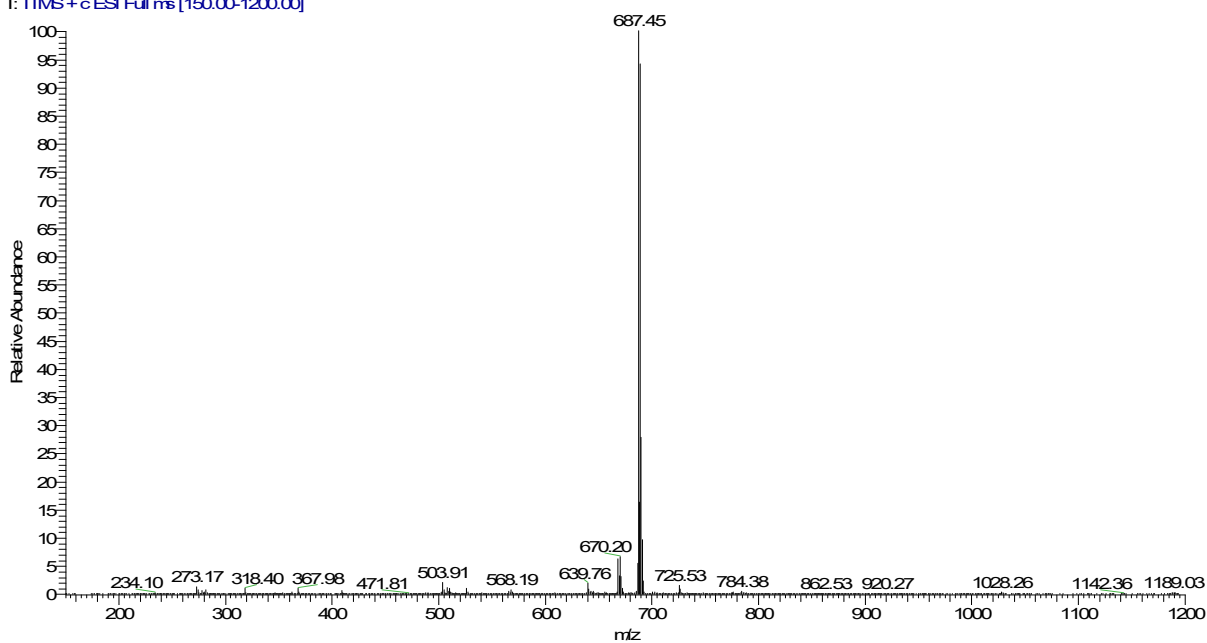

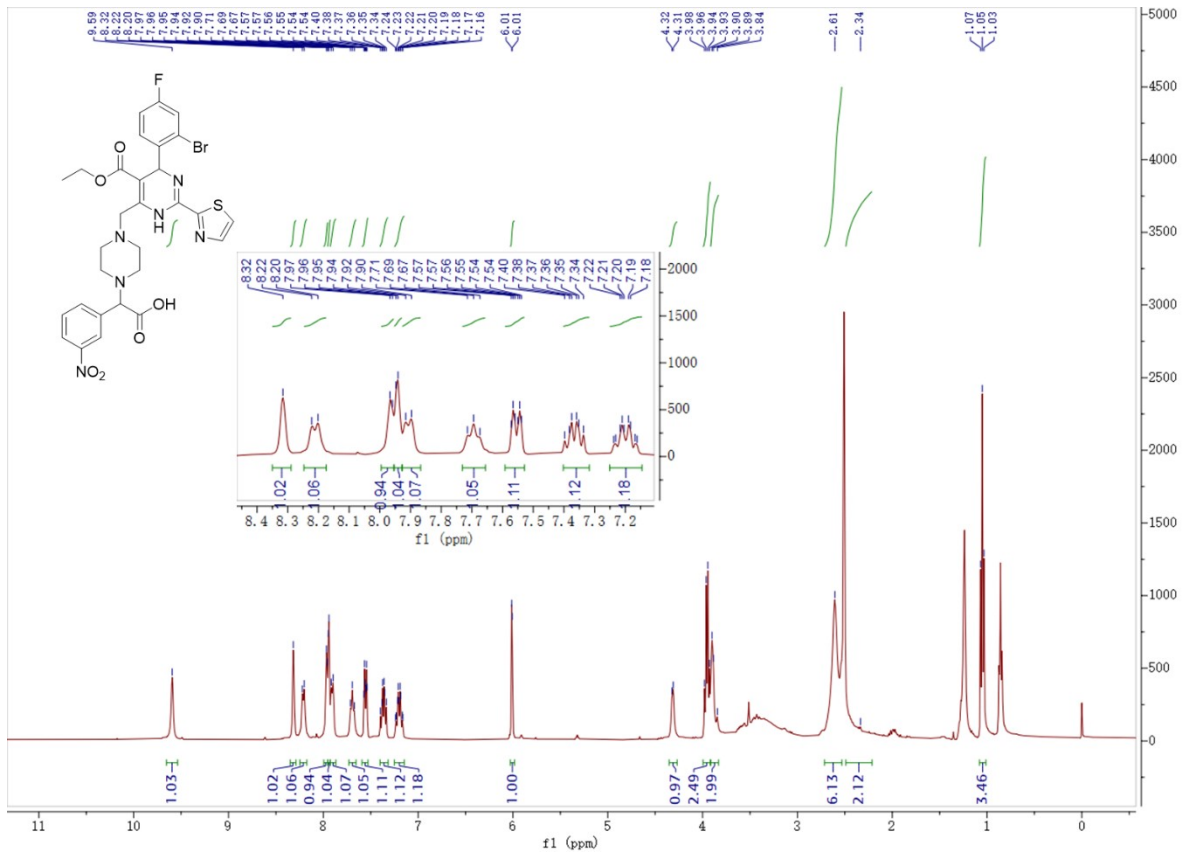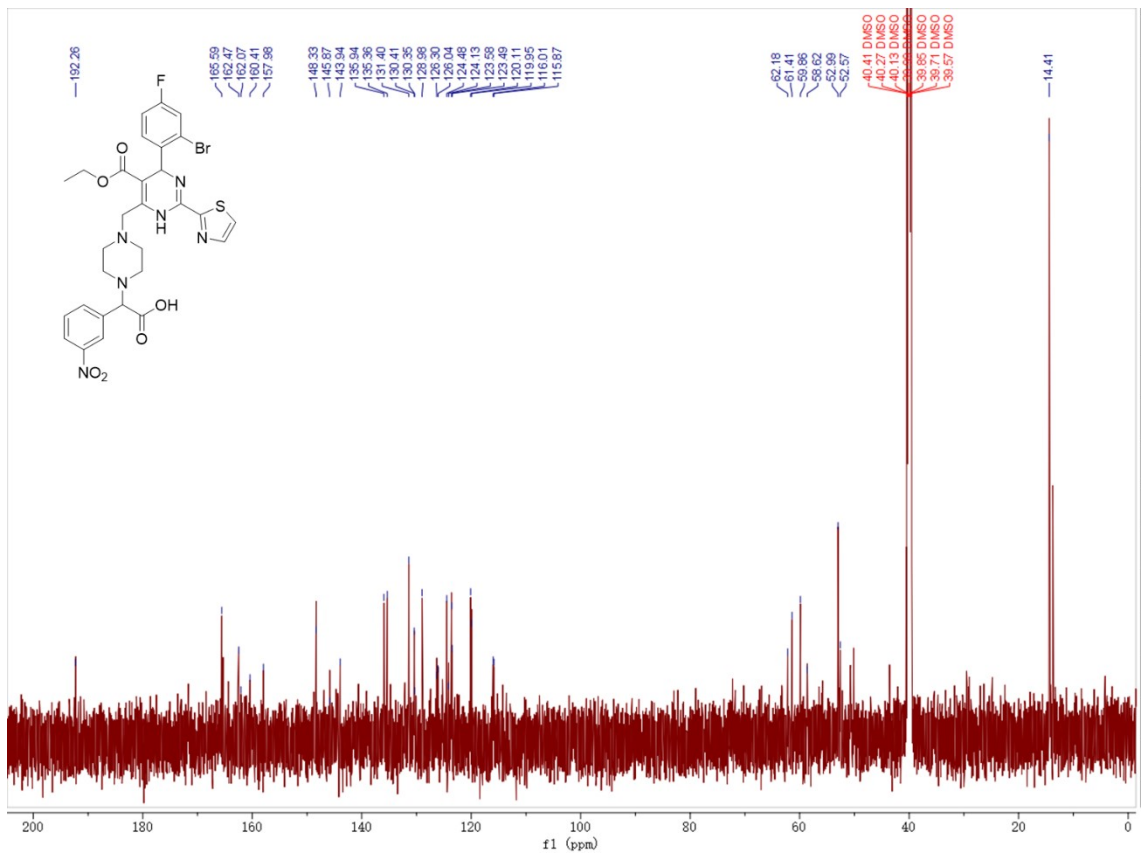

# ESI-MS, <sup>1</sup>H NMR and <sup>13</sup>C NMR spectra of compound **6b-1**

BOQ91\_0826 #3-5 RT: 0.01-0.02 AV: 3 NL: 8.54E4  
T: ITMS+c ESI Full ms [150.00-2000.00]

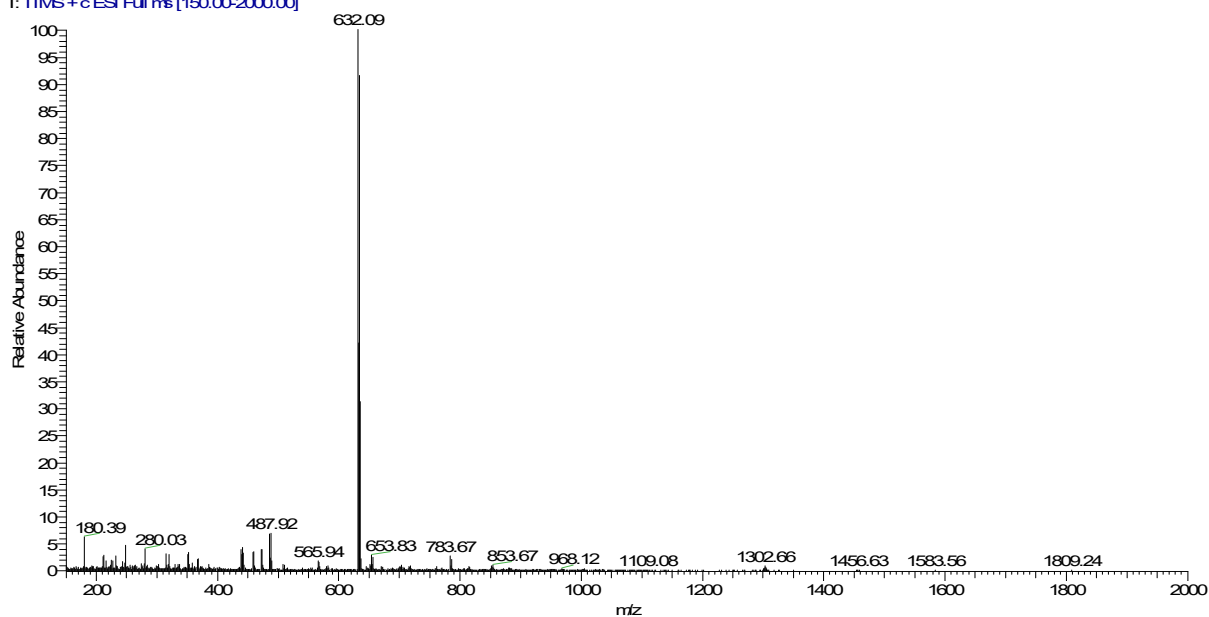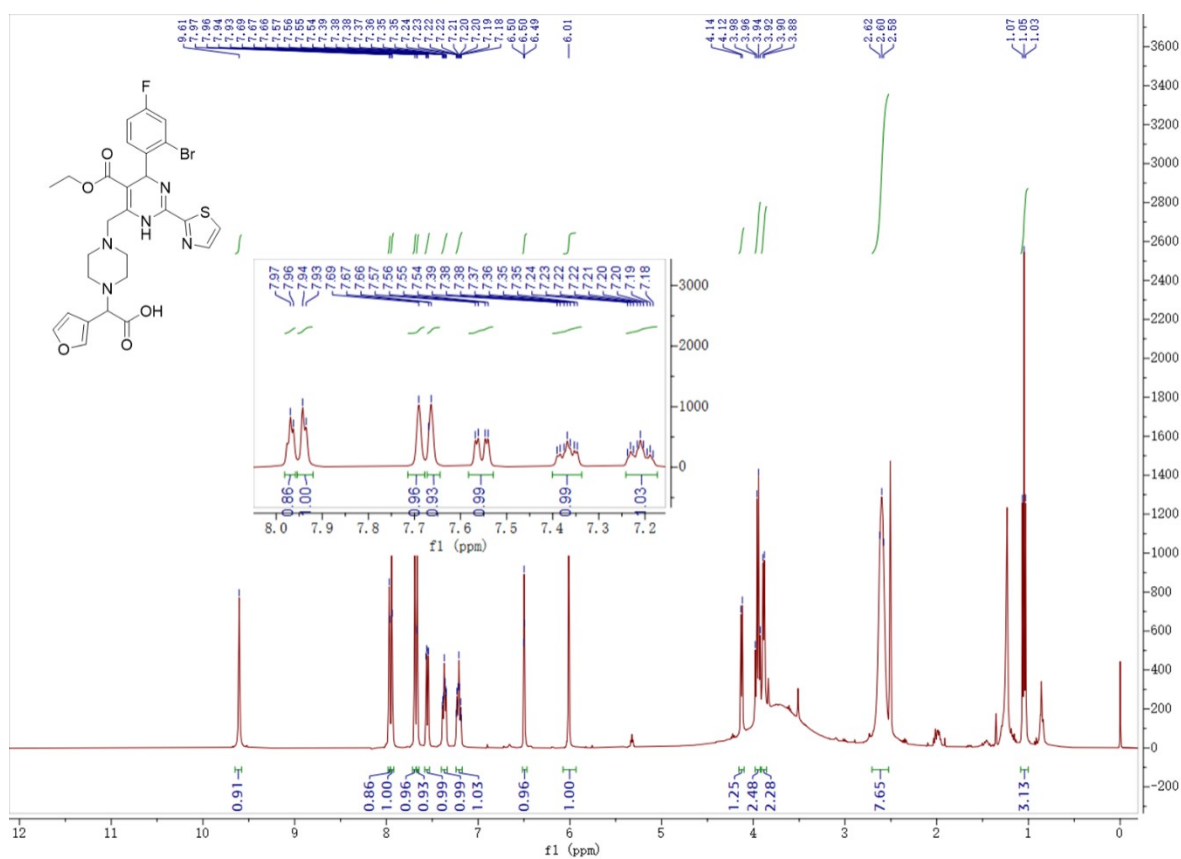

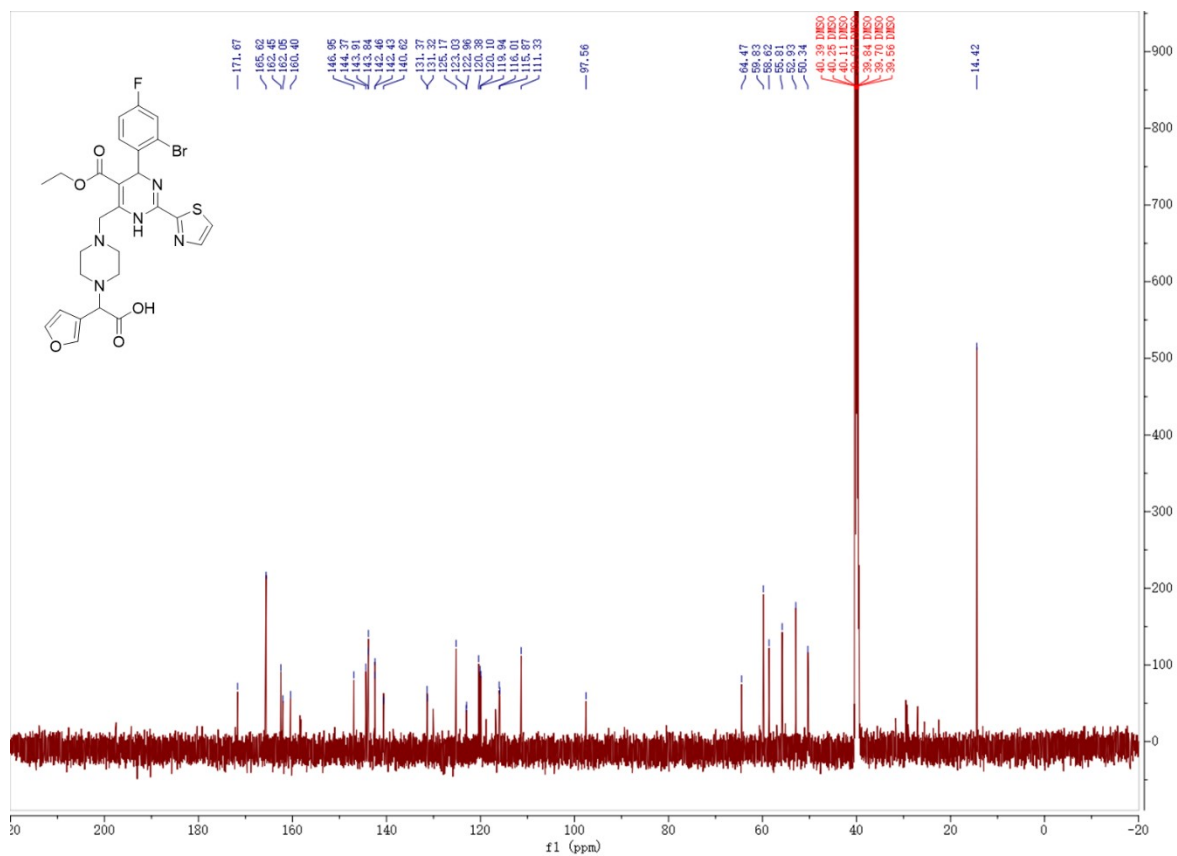

### ESI-MS, $^1\text{H}$ NMR and $^{13}\text{C}$ NMR spectra of compound **6b-5**

BCR-11\_210907211442#39-46 RT: 0.14-0.16 AV: 8 NL: 6.88E5  
T: ITMS+c ESI Full ms [150.00-1500.00]

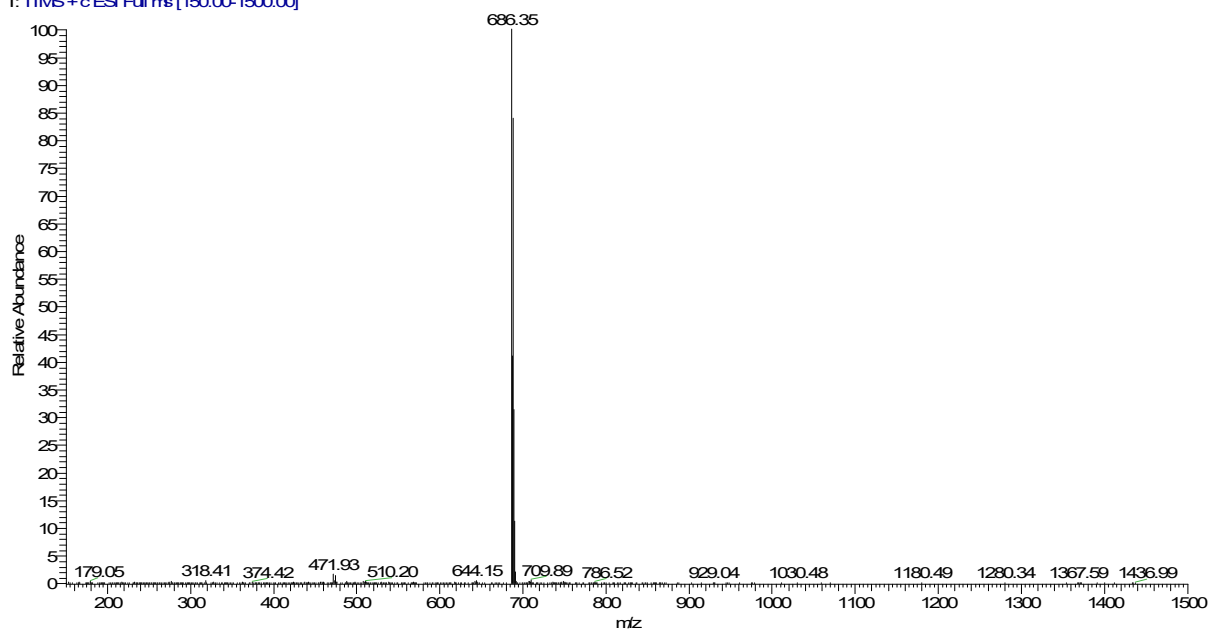



BOR14\_2021091303 #66 RT: 0.17 AV: 1 NL: 4.81E5  
T: ITMS+c ESI Full ms [150.00-900.00]

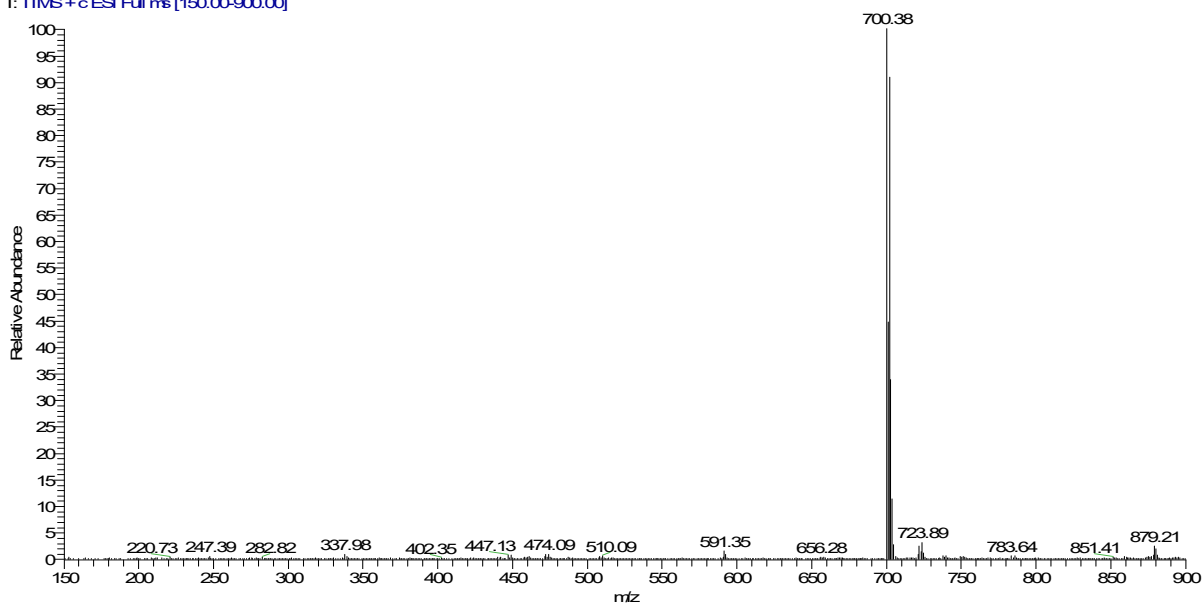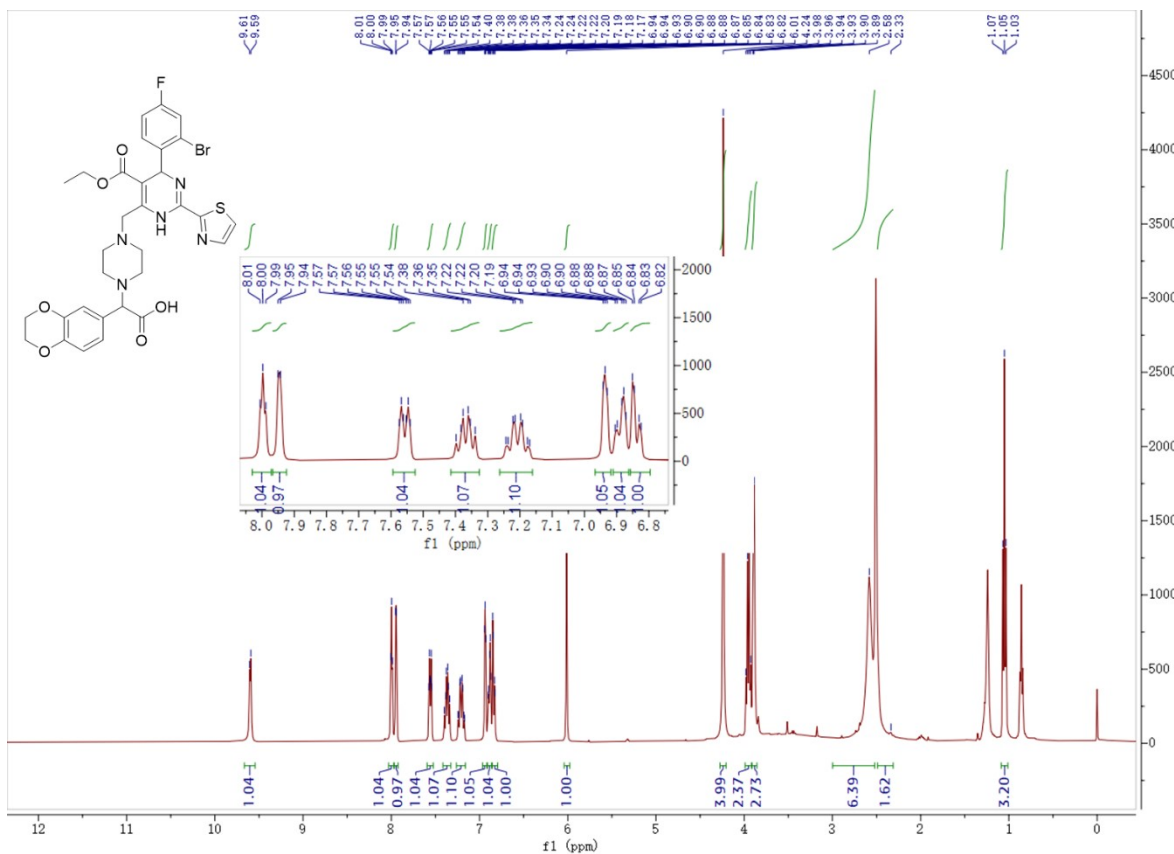



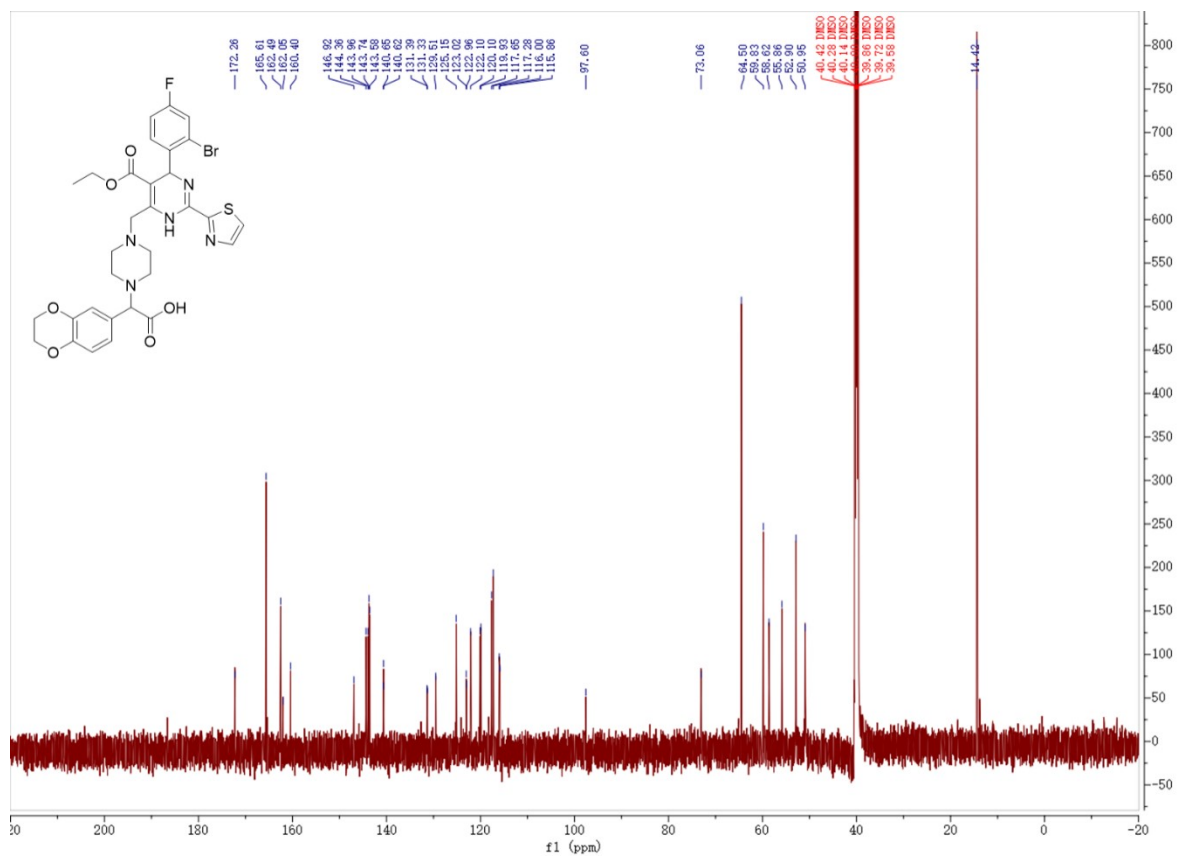

### ESI-MS, <sup>1</sup>H NMR and <sup>13</sup>C NMR spectra of compound **6b-7**

BCR42\_2021092704 #85 RT: 0.19 AV: 1 NL: 2.52E5  
T: ITMS + c ESI Full ms [300.00-800.00]

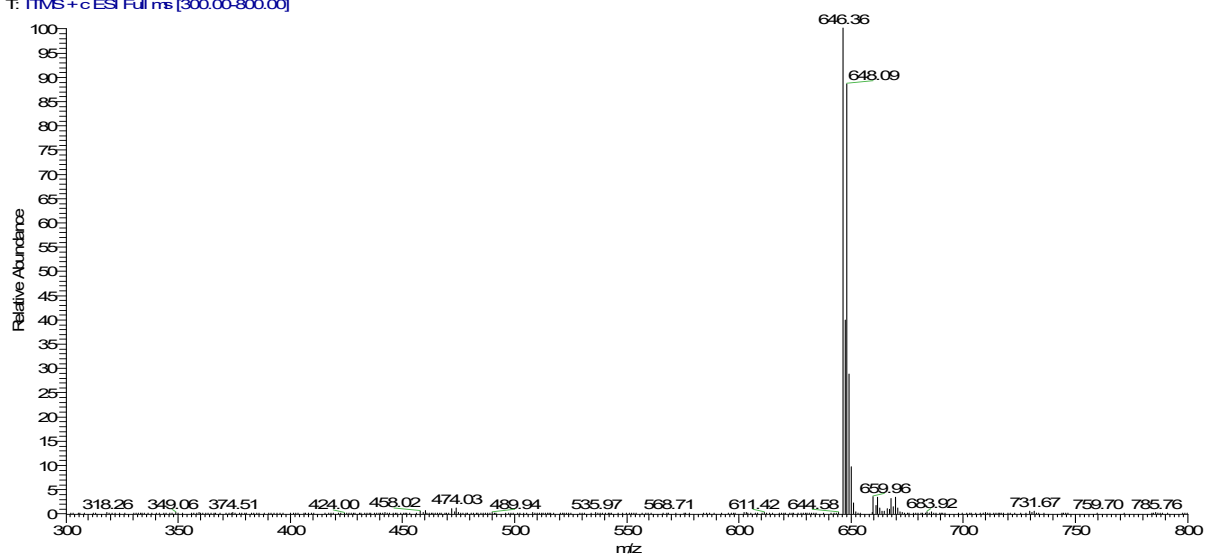

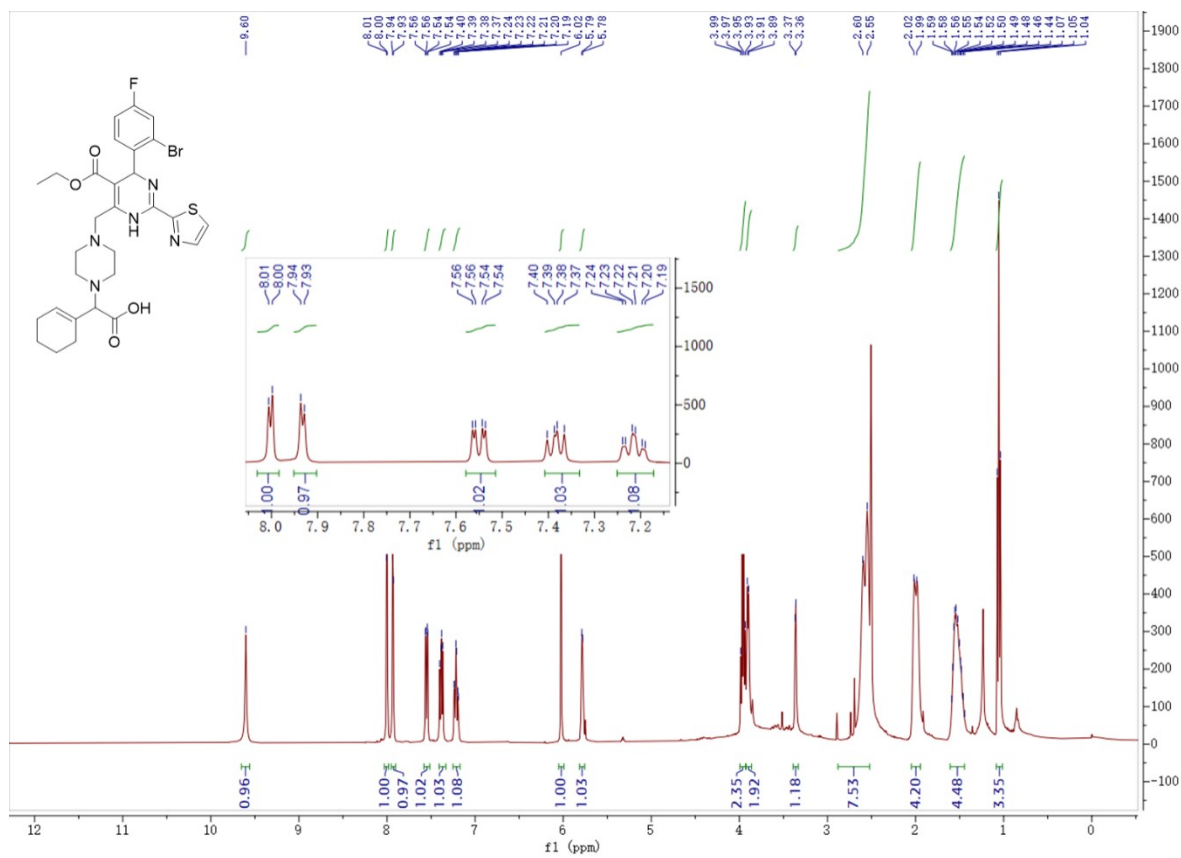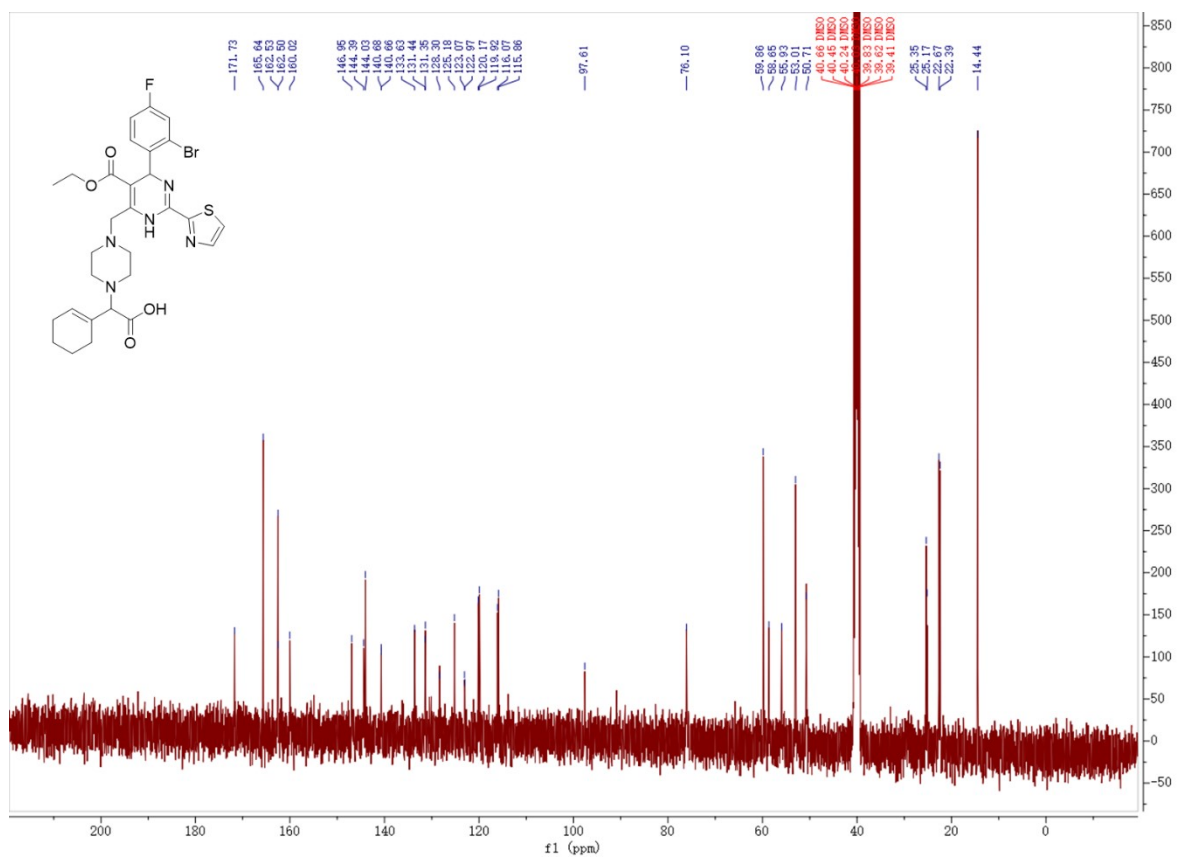

ESI-MS, <sup>1</sup>H NMR and <sup>13</sup>C NMR spectra of compound 6b-8

2021092004\_BCR-26 #45-93 RT: 0.15-0.32 AV: 49 NL: 1.27E5  
 T: ITMS + c ESI Full ms [150.00-1500.00]

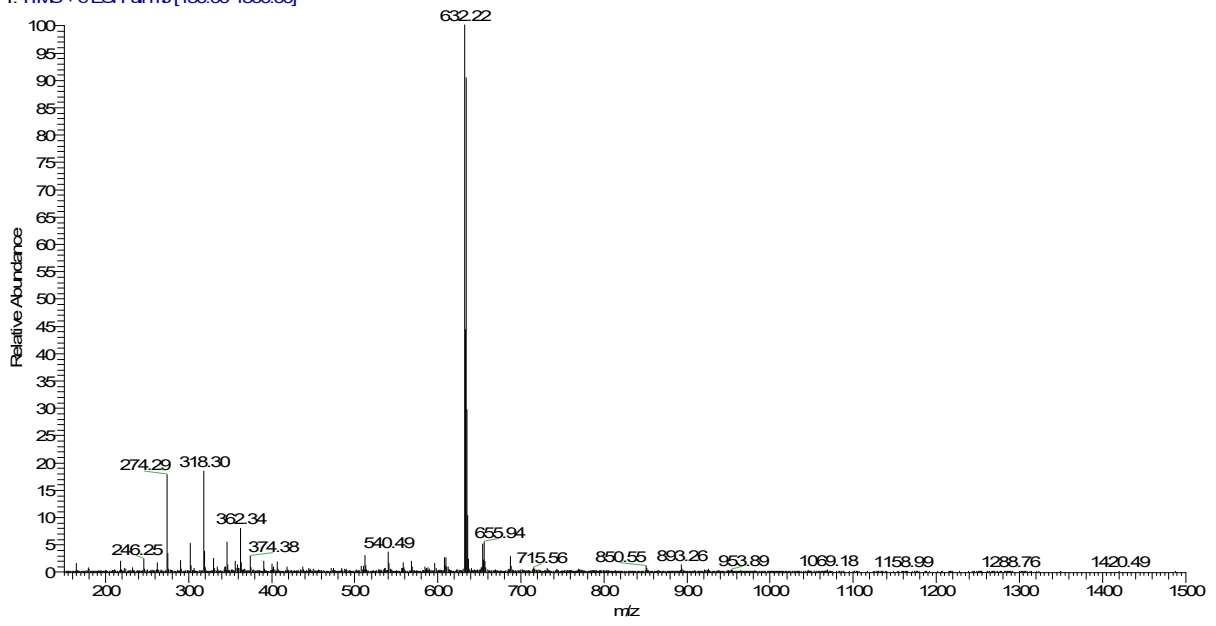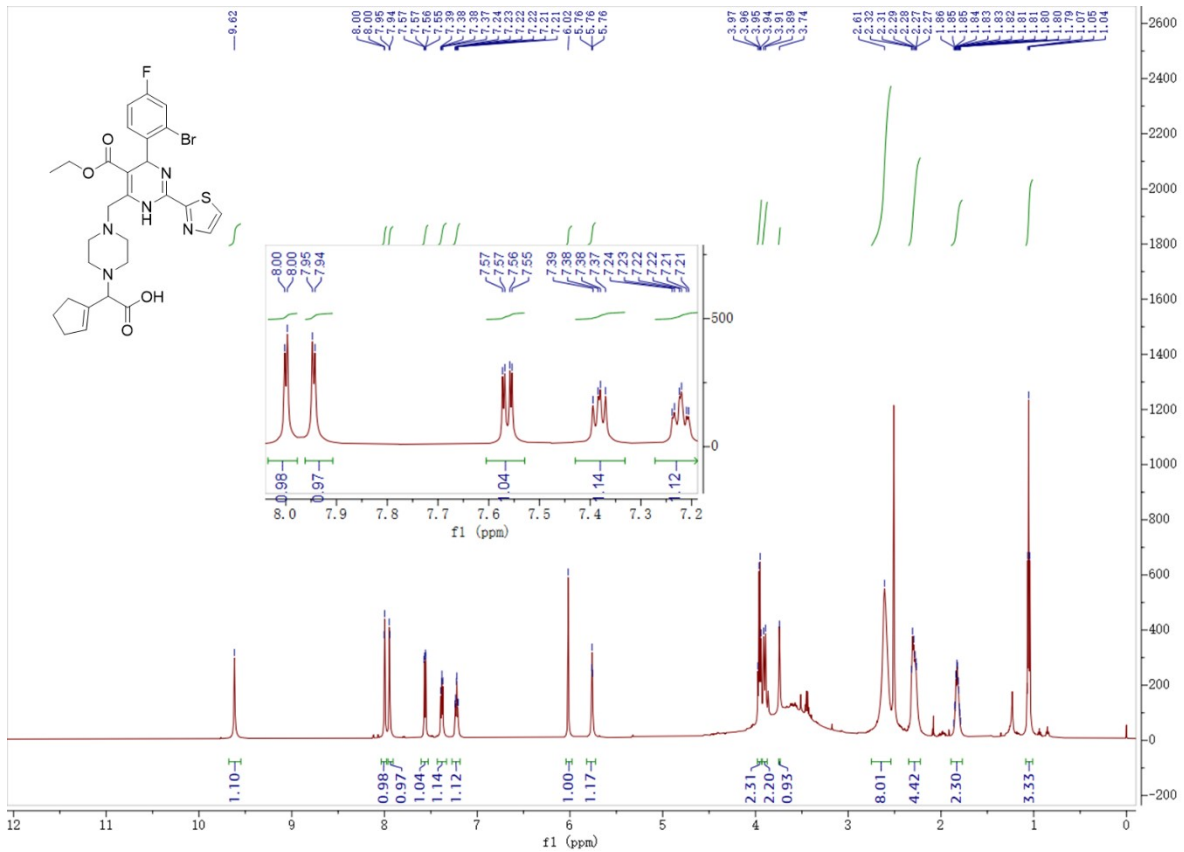

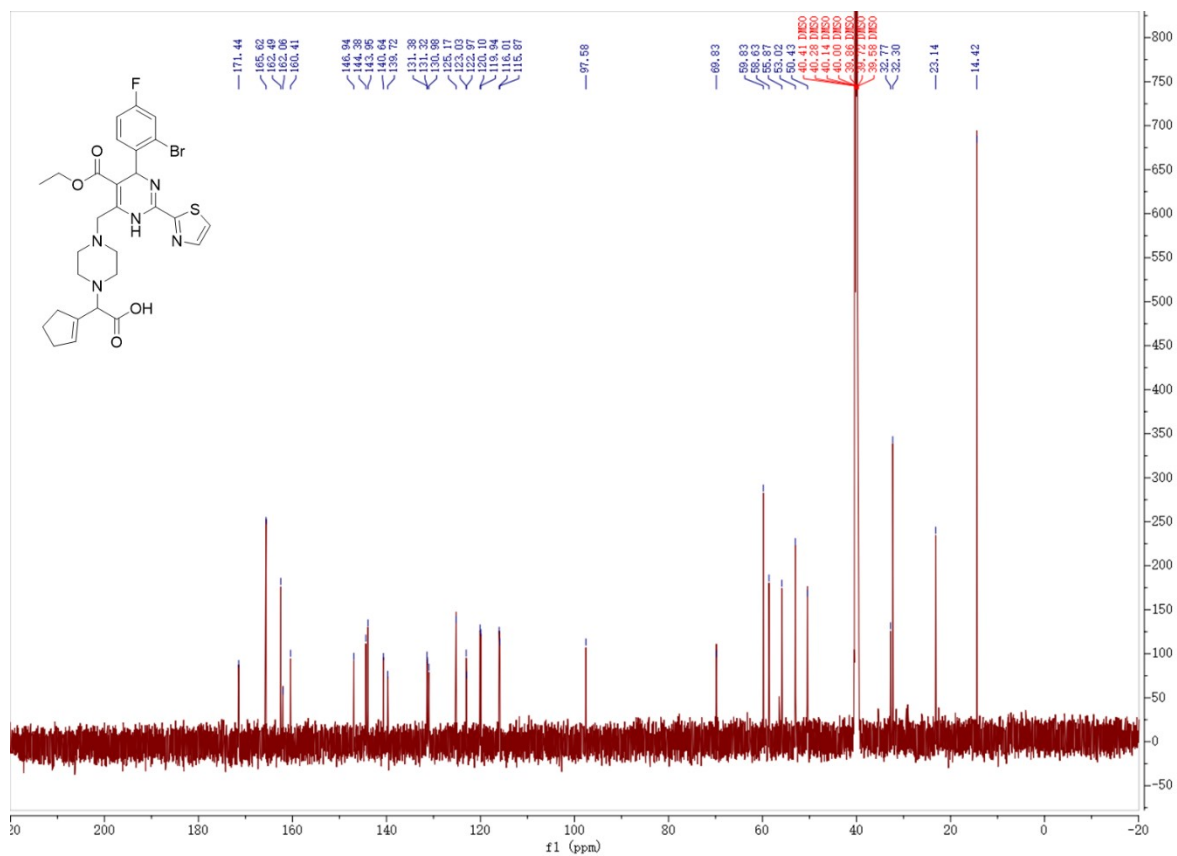

### ESI-MS, <sup>1</sup>H NMR and <sup>13</sup>C NMR spectra of compound **6b-9**

BCR15\_2021091303 #18 RT: 0.05 AM: 1 NL: 4.89E5  
T: ITMS + c ESI Full ms [150.00-900.00]

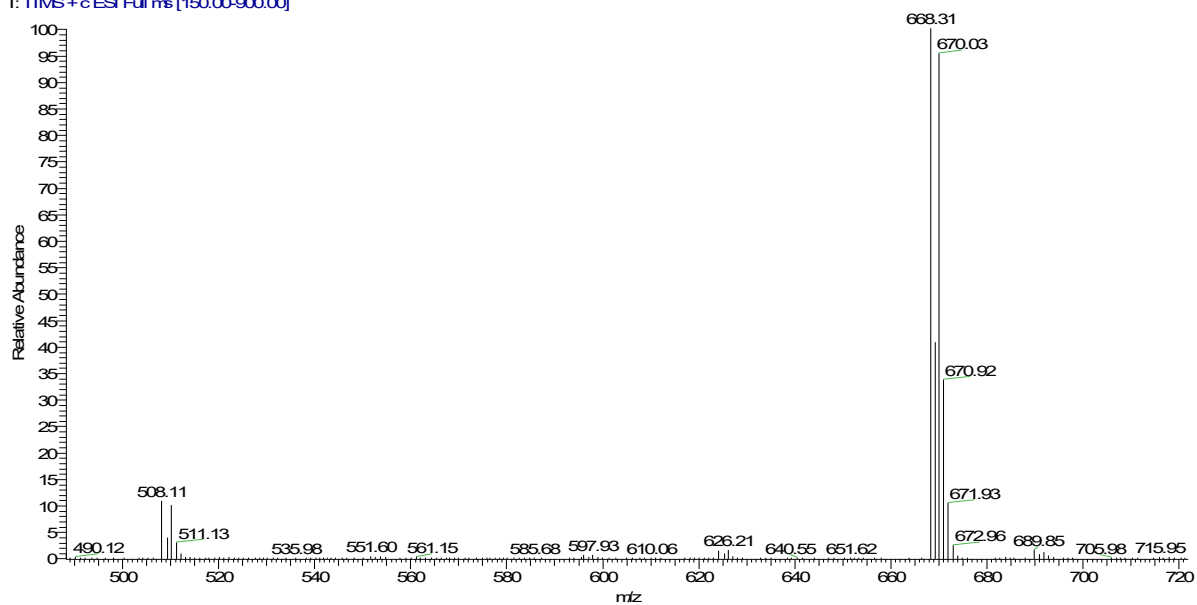

Supplement: d3md00461a1.pdf [file d3md00461a1.pdf]
